# Supplementary material
Source: publisher figshare collection journal article supplement (https://diabetesjournals.figshare.com/articles/dataset/_/26999500)

C) Three-dimensional fetal maximum abdominal subcutaneous tissue thickness trajectories by gestational age, second trimester and third trimester across maternal

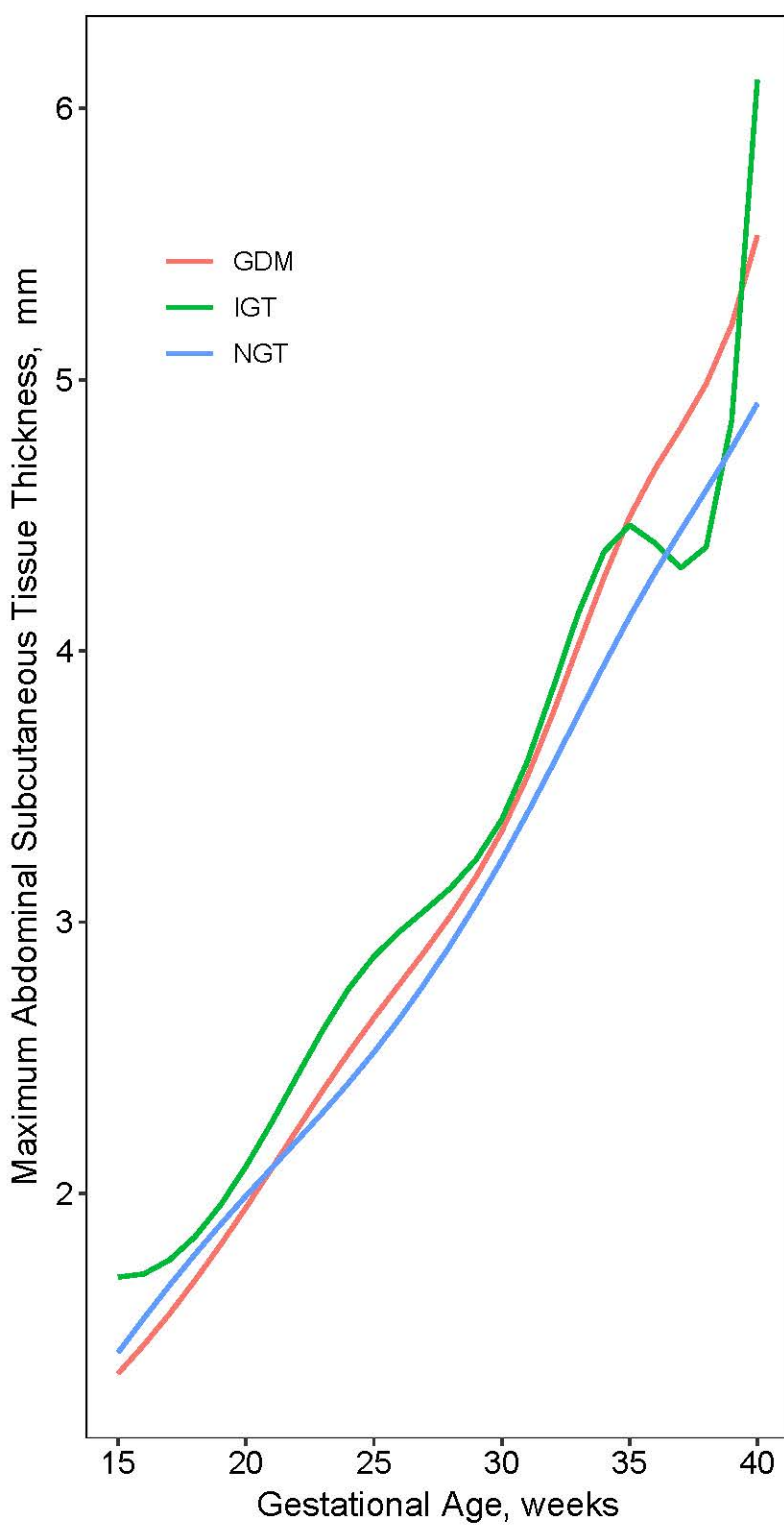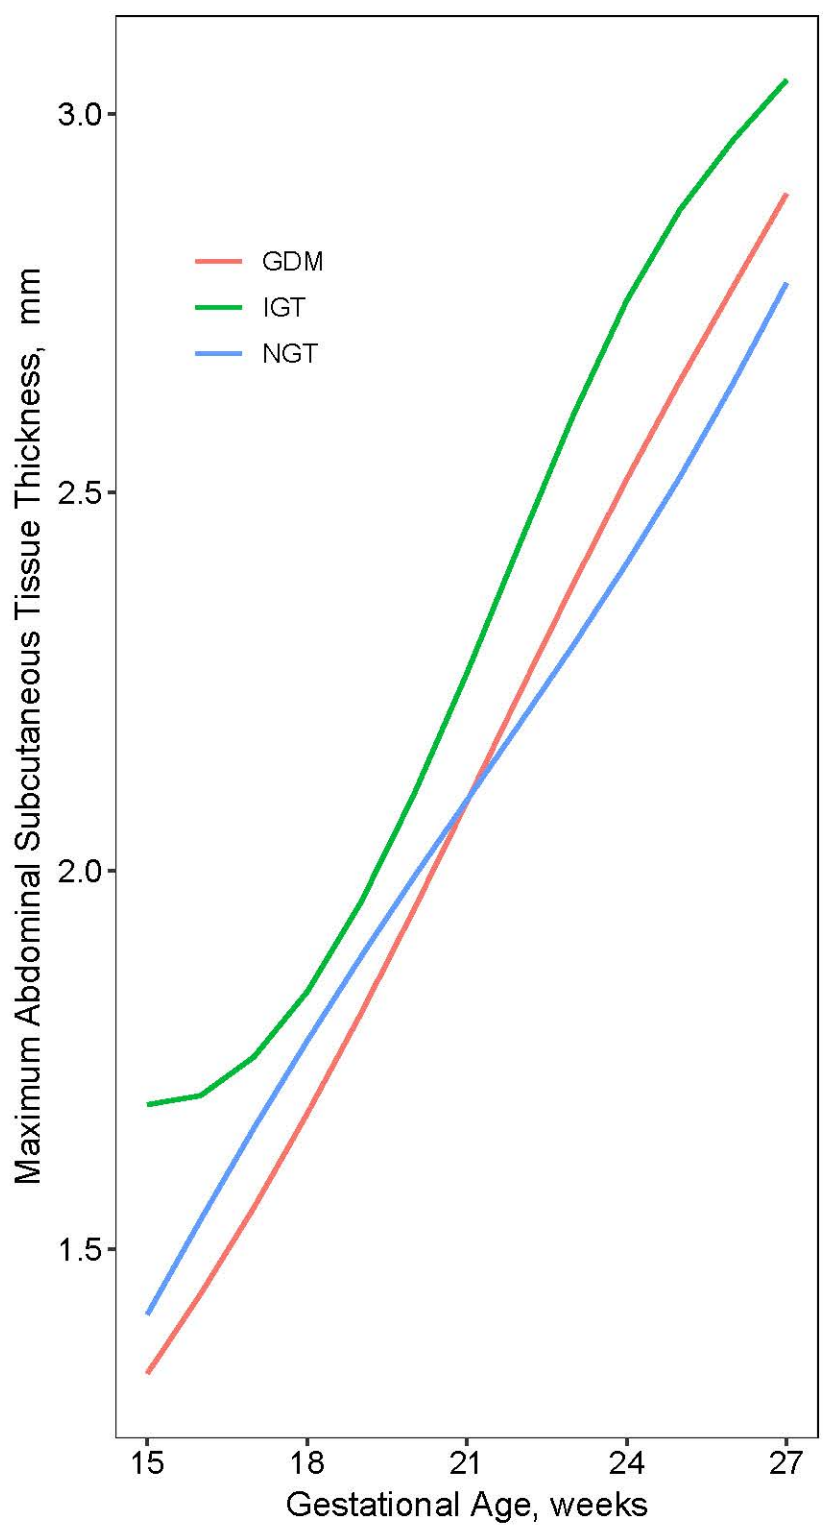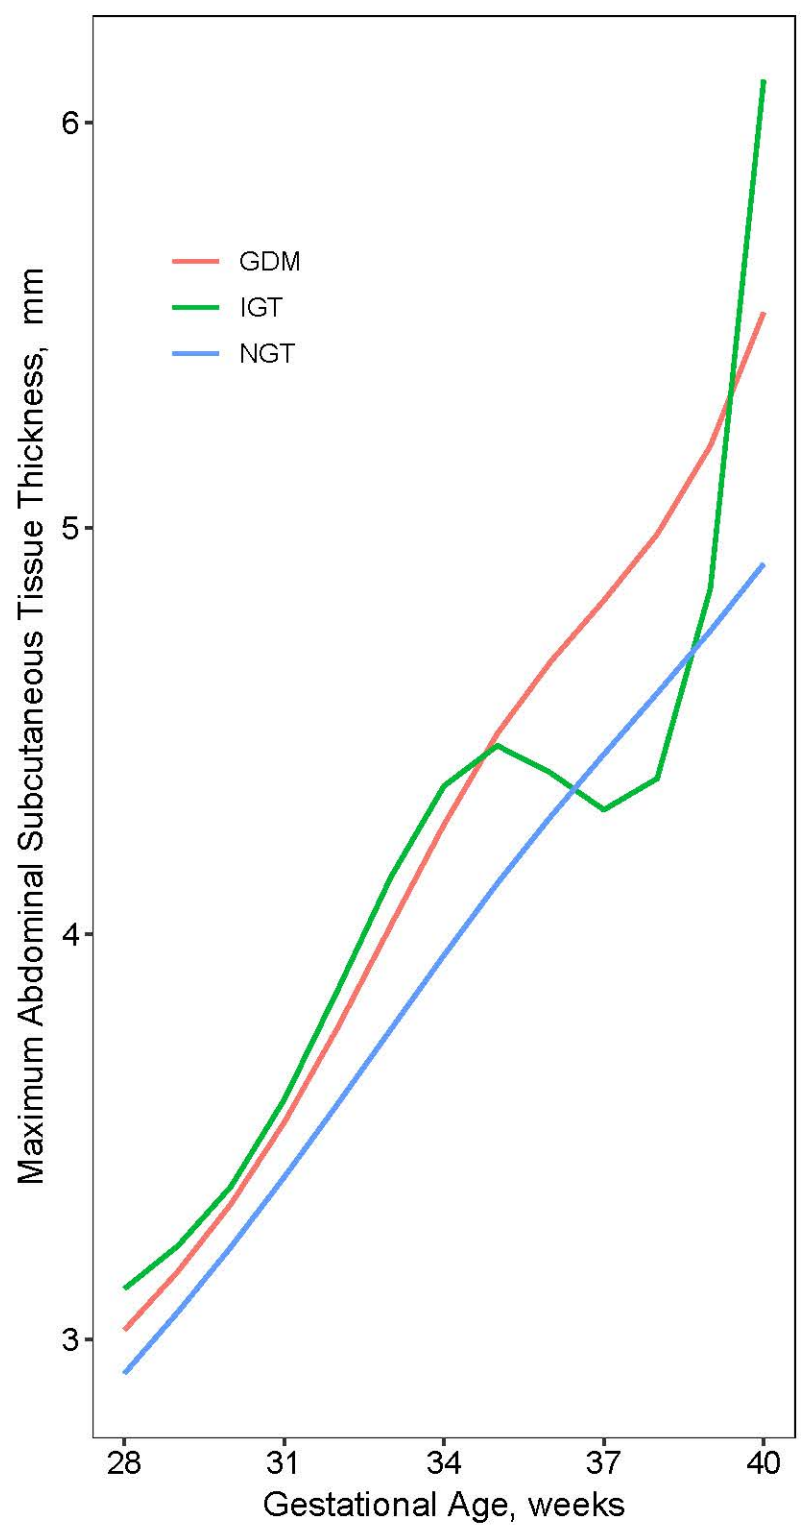

Supplement: Supplementary file 1 [file 1]
