# Supplementary material
Source: publisher figshare collection journal article supplement (https://diabetesjournals.figshare.com/articles/dataset/_/26999500)
Supplement: Supplementary file 2 [file 1]

Supplemental Figure 1. Three-dimensional fetal body composition and fractional lean arm volume trajectories by gestational age, second trimester, and third trimester across maternal glycemic status; NICHD Fetal 3D Study, 2015-2019.

Supplemental Figure 2. Three-dimensional fetal body composition and organ volume trajectories with weekly differences by gestational age across maternal glycemic status; NICHD Fetal 3D Study, 2015-2019.
