# Supplementary material
Source: publisher figshare collection journal article supplement (https://diabetesjournals.figshare.com/articles/dataset/_/26999500)

A) Three-dimensional fetal fractional lean arm volume trajectories by gestational age, second trimester and third trimester across maternal glycemic status.

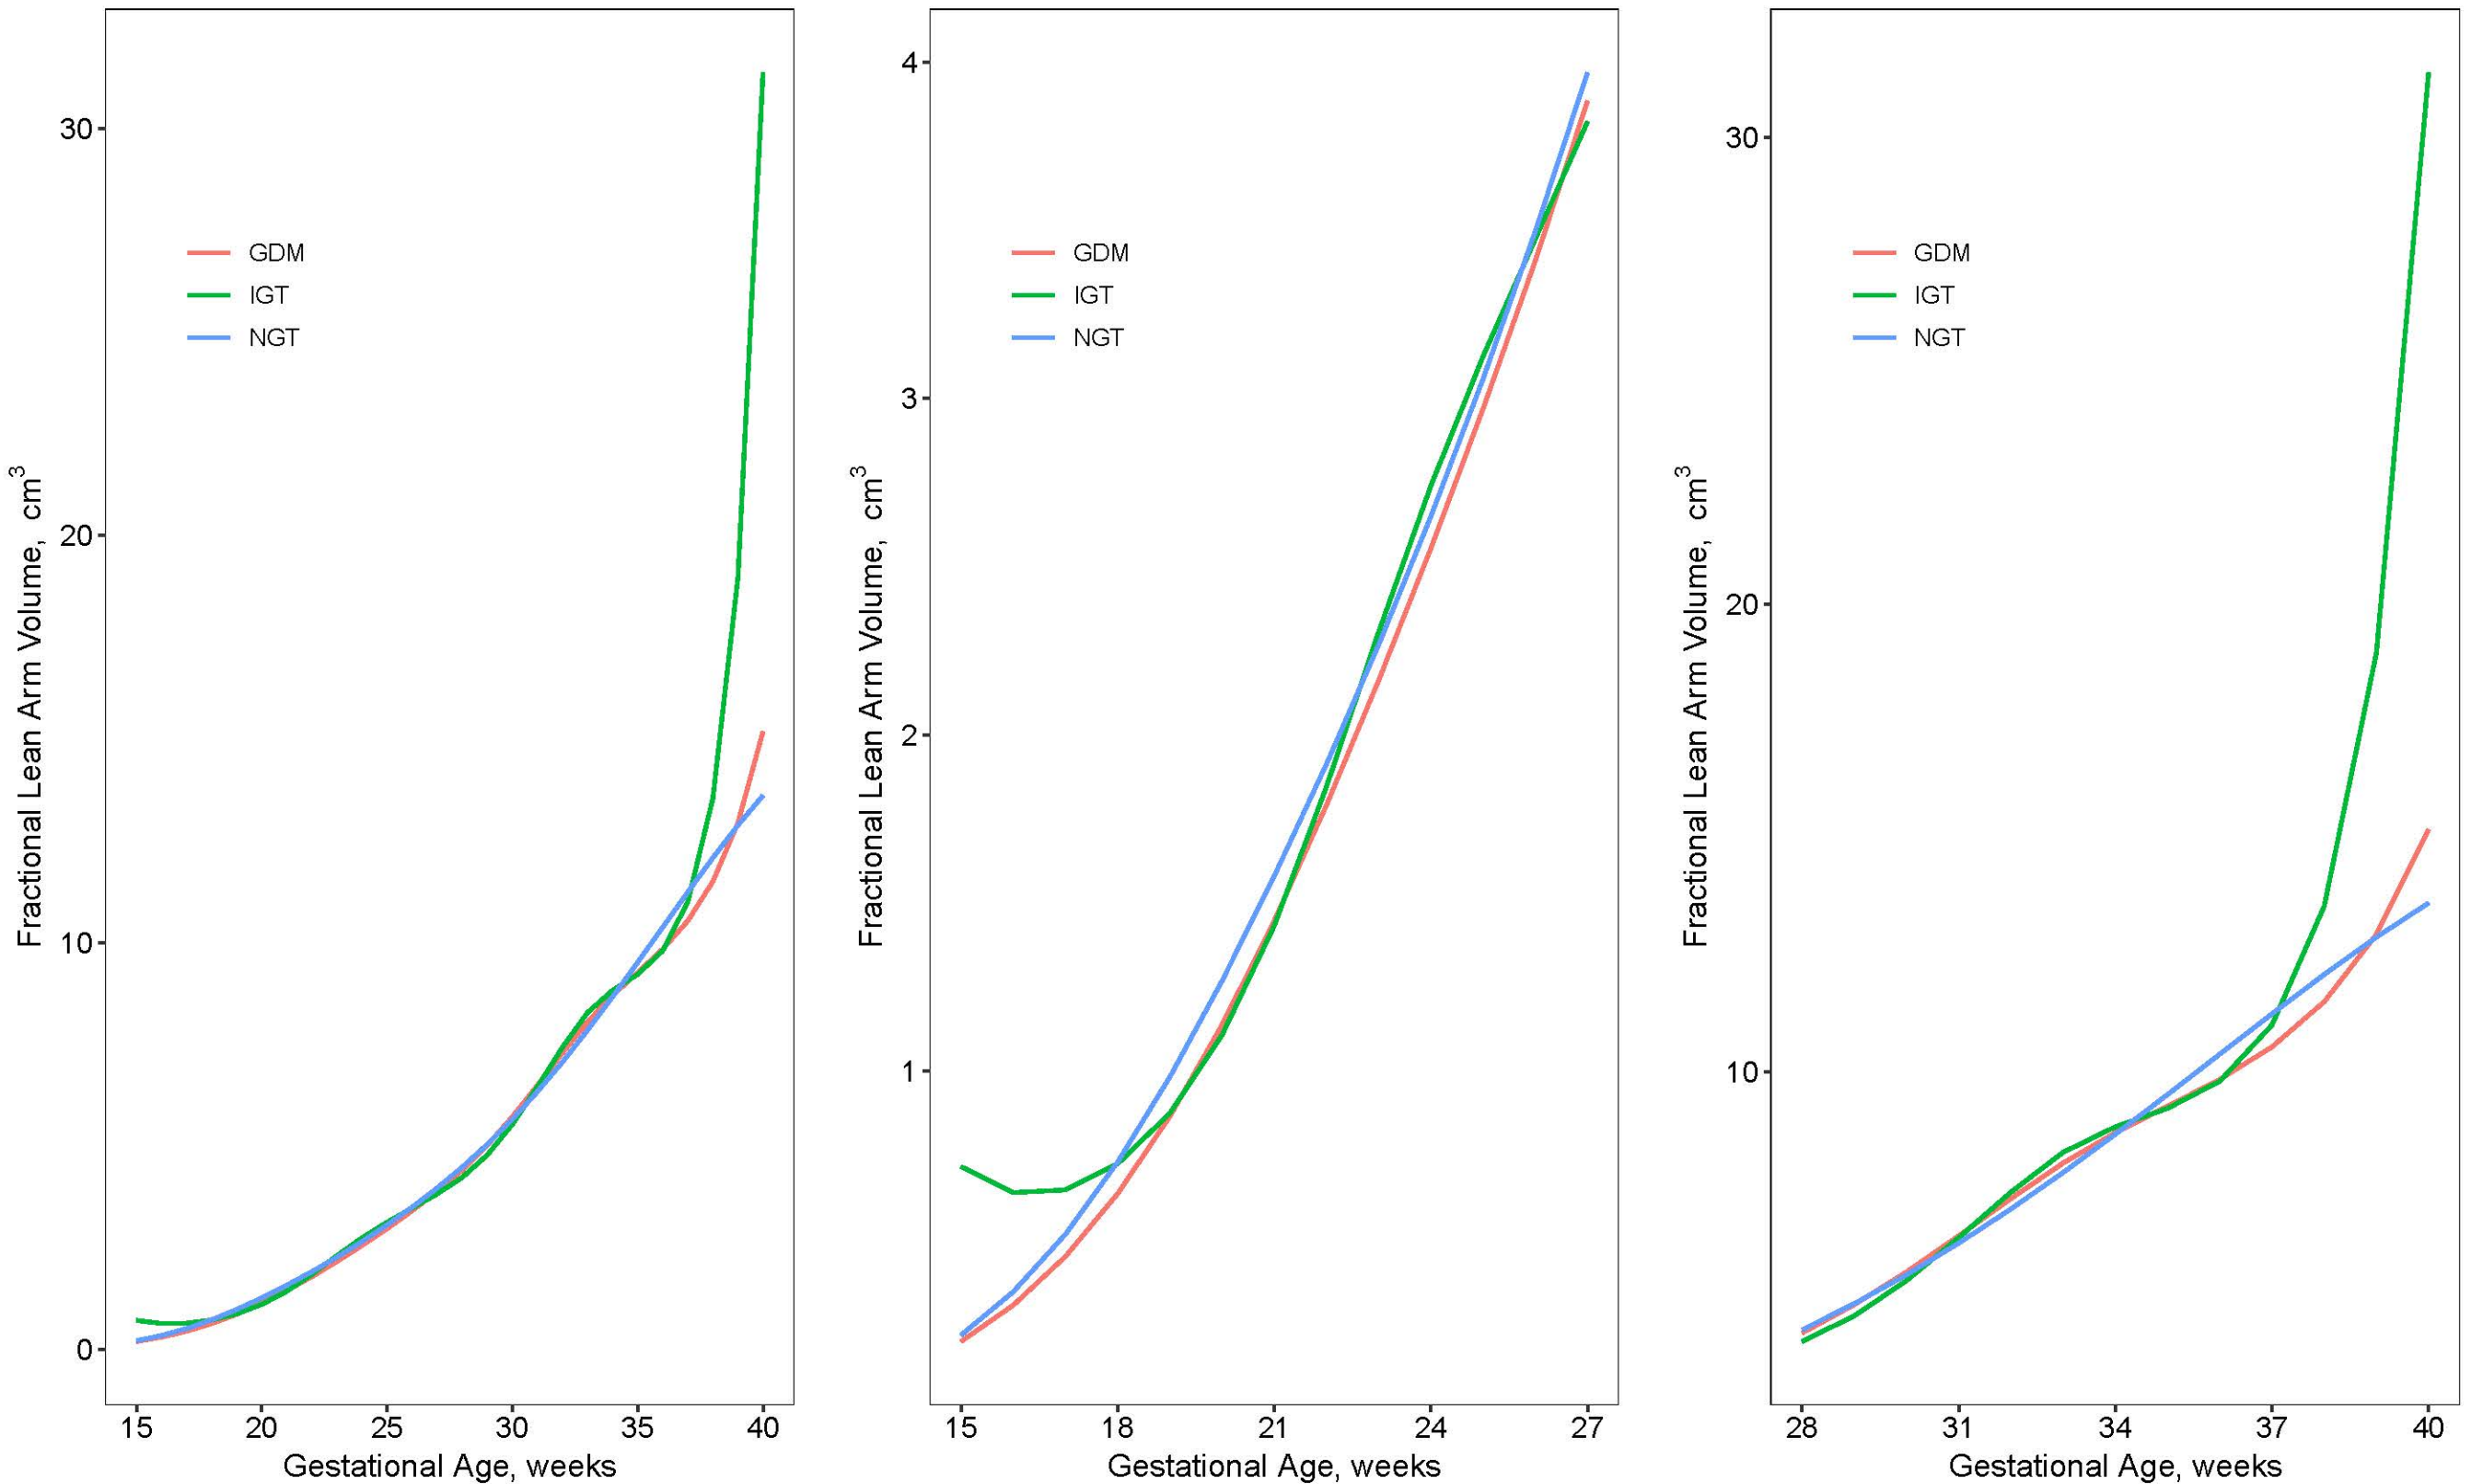

Supplement: Supplementary file 3 [file 1]
