# Supplementary material
Source: publisher figshare collection journal article supplement (https://diabetesjournals.figshare.com/articles/dataset/_/26999500)

B) Three-dimensional fetal abdominal area trajectories by gestational age, second trimester and third trimester across maternal glycemic status.

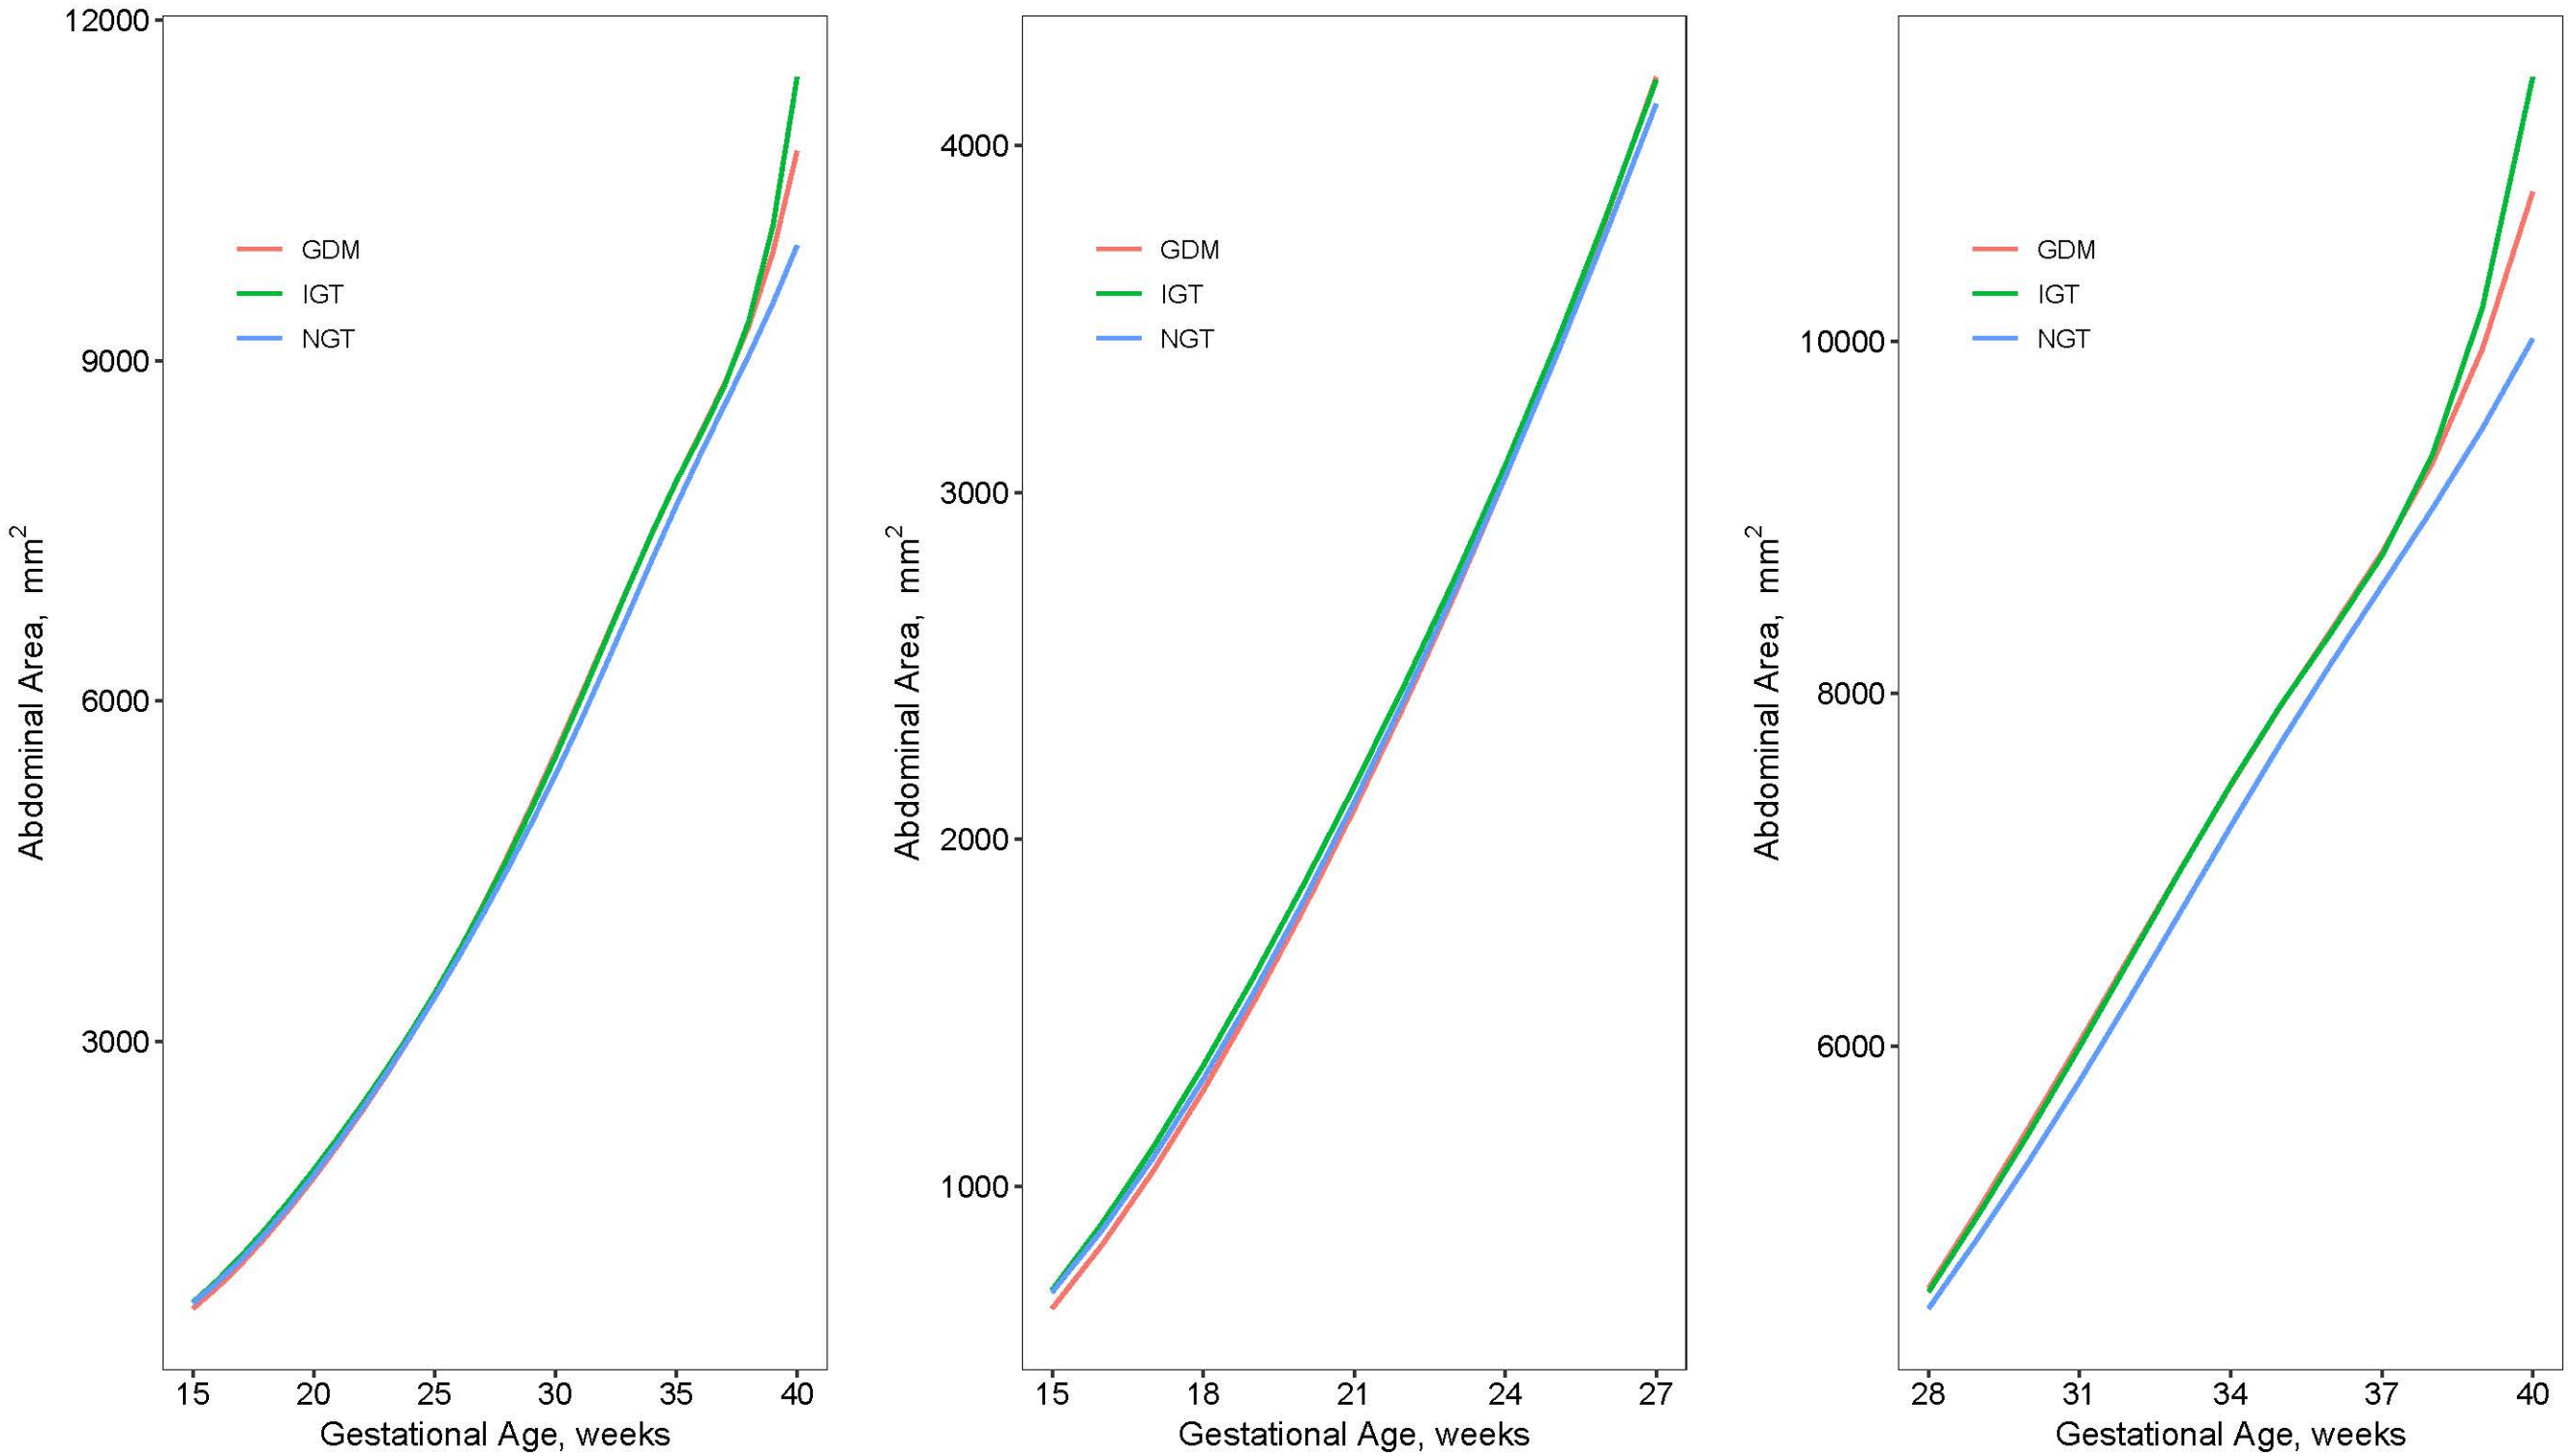

Supplement: Supplementary file 5 [file 1]
