# Supplementary material
Source: publisher figshare collection journal article supplement (https://diabetesjournals.figshare.com/articles/dataset/_/26999500)

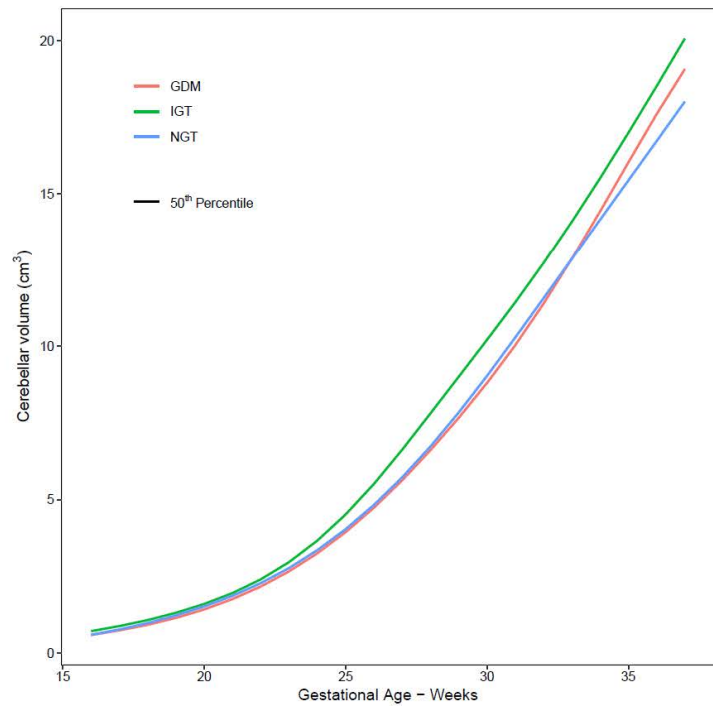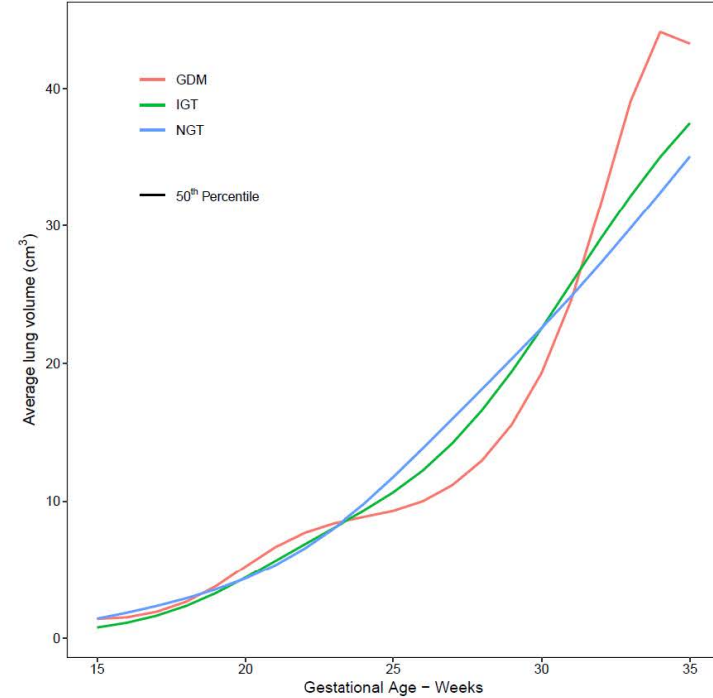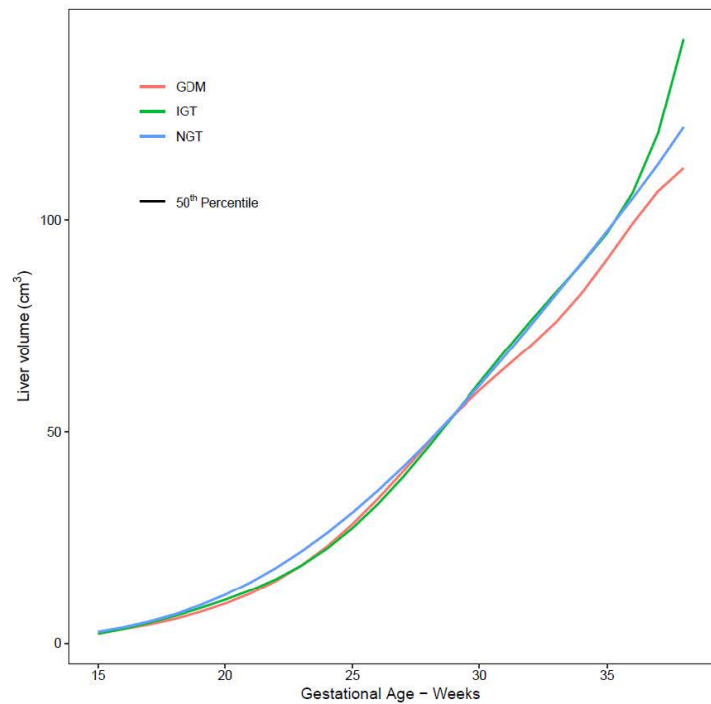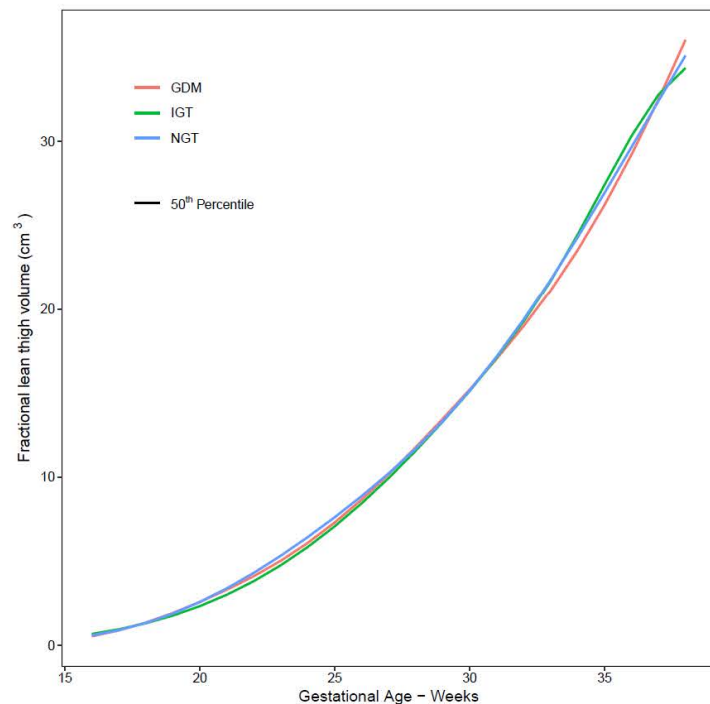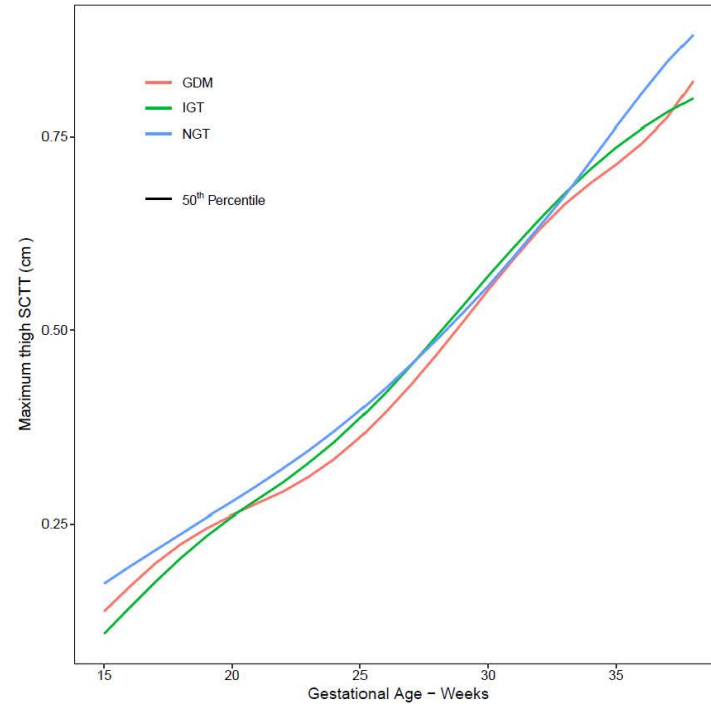

Supplement: Supplementary file 4 [file 1]
